# Supplementary material
Source: PubMed Central journal article supplement (PMC8649681)
Supplement: 15010_2021_1737_MOESM1_ESM.pdf [file 15010_2021_1737_MOESM1_ESM.pdf]

## Online supplemental material

### Clinical course and risk factors for severe COVID-19 among Italian patients with cystic fibrosis: a study within the Italian Cystic Fibrosis Society

**Supplemental table S1.** Characteristics of the four patients who reported COVID-19 related symptoms lasting 90 days and more.

|                                                  | No. |
|--------------------------------------------------|-----|
| Male sex                                         | 2   |
| Age category (years)                             |     |
| 0-19                                             | 1   |
| 20-39                                            | 1   |
| ≥40                                              | 2   |
| Pancreatic insufficiency                         | 3   |
| FEV <sub>p</sub> <40%                            | 0   |
| Oxygen therapy at baseline                       | 0   |
| Chronic Pa infection                             | 1   |
| Underweight                                      | 0   |
| Organ transplantation                            | 0   |
| Diabetes                                         | 1   |
| Liver disease                                    | 0   |
| Hospitalization due to COVID-19                  | 1   |
| Admission to intensive care unit due to COVID-19 | 0   |

Abbreviations: FEV<sub>p</sub> - Forced expiratory volume in one second, expressed as percentage of predicted value; Pa - *Pseudomonas aeruginosa*.

**Supplemental table S2.** Odds ratios (ORs) for severe COVID-19 obtained from logistic regression models adjusted for age and pancreatic insufficiency in patients with cystic fibrosis infected by SARS-CoV-2 between March 2020 and June 2021 in Italy, according to selected clinical characteristics. Analysis restricted to patients aged  $\geq 18$  years.

|                                  | OR [95% CI]       | <i>P</i> * |
|----------------------------------|-------------------|------------|
| FEV1p (<40% vs $\geq$ 40%)       | 3.28 [1.03-10.42] | 0.044      |
| Oxygen (Yes vs No)               | 5.23 [1.12-24.37] | 0.035      |
| Chronic Pa infection (Yes vs No) | 1.29 [0.56-2.96]  | 0.544      |
| Underweight (Yes vs No)          | 1.80 [0.55-5.91]  | 0.329      |
| Organ transplant (Yes vs No)     | 5.58 [1.85-16.81] | 0.002      |
| Diabetes (Yes vs No)             | 1.76 [0.75-4.15]  | 0.197      |
| Liver disease (Yes vs No)        | 4.42 [1.87-10.45] | 0.001      |
| CFTR modulators (HE vs None)     | 0.43 [0.09-2.09]  | 0.502      |
| CFTR modulators (OM vs None)     | 0.77 [0.25-2.36]  |            |
| Inhaled steroids (Yes vs No)     | 1.08 [0.48-2.40]  | 0.859      |
| Dornase alfa (Yes vs No)         | 0.27 [0.09-0.86]  | 0.026      |
| Azithromycin (Yes vs No)         | 2.95 [1.28-6.79]  | 0.011      |

Abbreviations: HE - Highly effective CFTR modulators; OM – Other CFTR modulators; Pa – *Pseudomonas aeruginosa*.

\**P* values were obtained using the likelihood ratio test between two nested models (i.e. the null model and the model including the variable of interest).

**Supplemental table S3.** Characteristics of the 17 patients who lost more than 10 points of FEV<sub>p</sub> from baseline to follow-up (i.e. first visit after end of symptoms for symptomatic patients or after testing positive for SARS-CoV-2 for asymptomatic patients).

|                                                  | No. (%)   |
|--------------------------------------------------|-----------|
| Male sex                                         | 7 (41.2)  |
| Age category                                     |           |
| 0-19                                             | 8 (47.1)  |
| 20-39                                            | 5 (29.4)  |
| ≥40                                              | 4 (23.5)  |
| Pancreatic insufficiency                         | 13 (76.5) |
| FEV <sub>p</sub> <40%                            | 0         |
| Oxygen therapy at baseline                       | 0         |
| Chronic Pa infection                             | 7 (41.2)  |
| Underweight                                      | 3 (17.6)  |
| Organ transplantation                            | 1 (5.9)   |
| Diabetes                                         | 5 (29.4)  |
| Liver disease                                    | 4 (23.5)  |
| Hospitalization due to COVID-19                  | 4 (23.5)  |
| Admission to intensive care unit due to COVID-19 | 0         |

Abbreviations: FEV<sub>p</sub> - Forced expiratory volume in one second, expressed as percentage of predicted value; Pa - *Pseudomonas aeruginosa*.
